# Supplementary material for: Urban stream rehabilitation in a densely populated Brazilian metropolis
Source: Frontiers journal article supplement (doi:10.3389/fenvs.2022.921934), 2022-09-08

The WQI is calculated using the weighted product of the nine parameters, according to the following formula:

$$IQA = \prod_{i=1}^9 q_i^{w_i}$$

Where:

WQI = Water Quality Index. A number between 0 and 100;

$q_i$  = quality of the  $i$ -th parameter. A number between 0 and 100, obtained from the respective quality chart, as a function of its concentration or measurement (analysis result);

$w_i$  = weight corresponding to the  $i$ -th parameter fixed according to its importance for the global conformation of quality, that is. a number between 0 and 1, so that:

$$\sum_{i=1}^n w_i = 1$$

where  $n$  is the number of parameters that enter the WQI calculation.

## AVERAGE QUALITY CURVES OF PARAMETERS

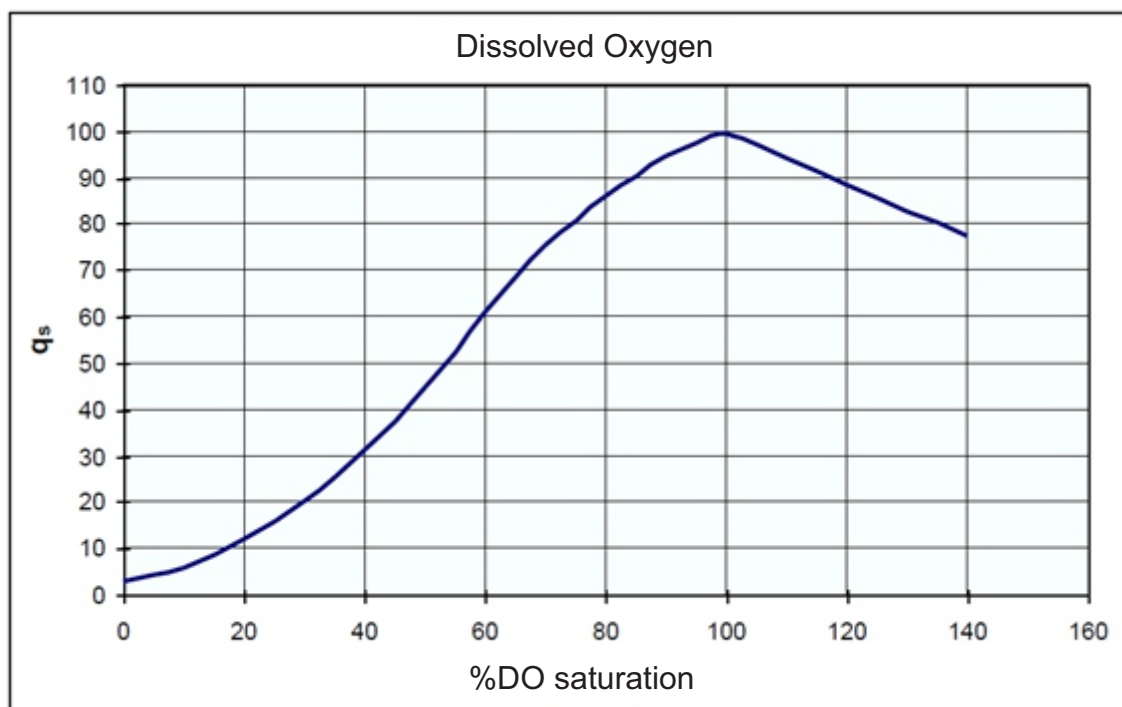

*Escherichia coli*

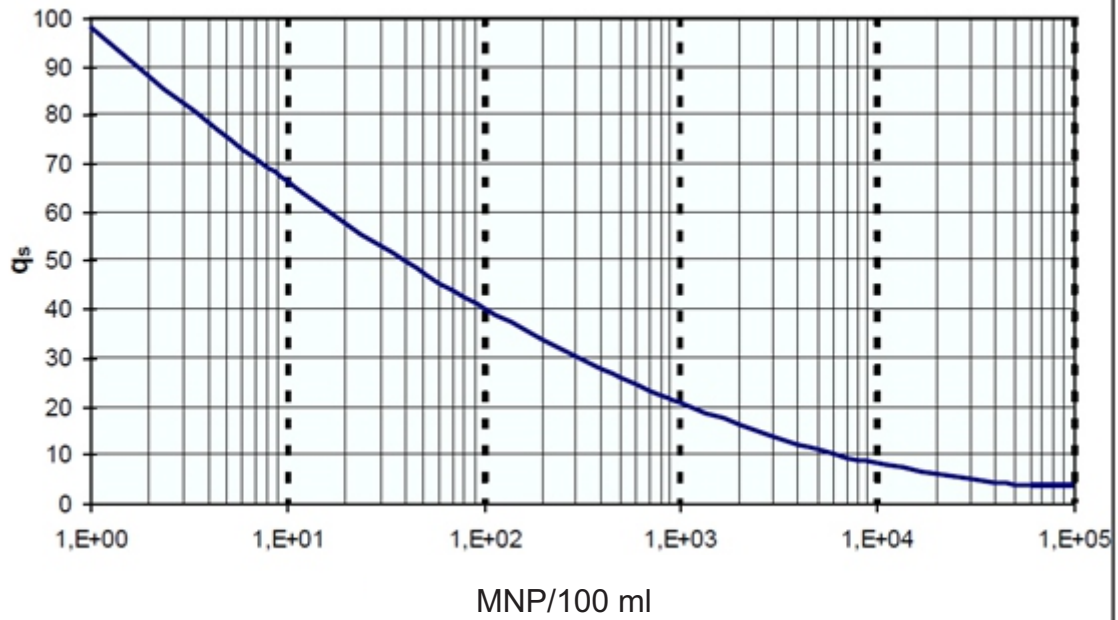

pH

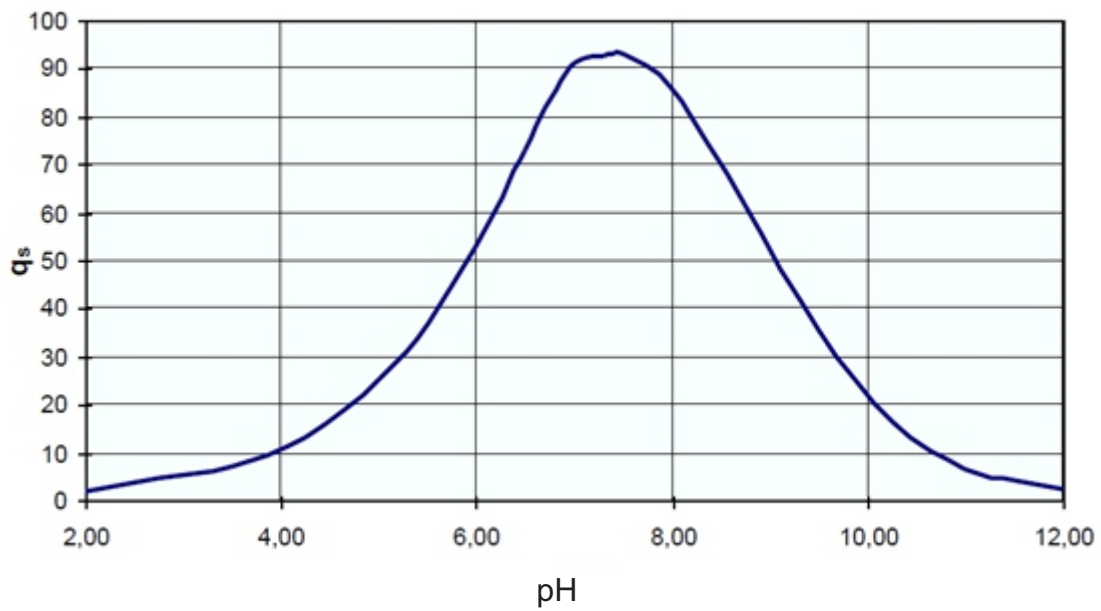

Total Phosphorous

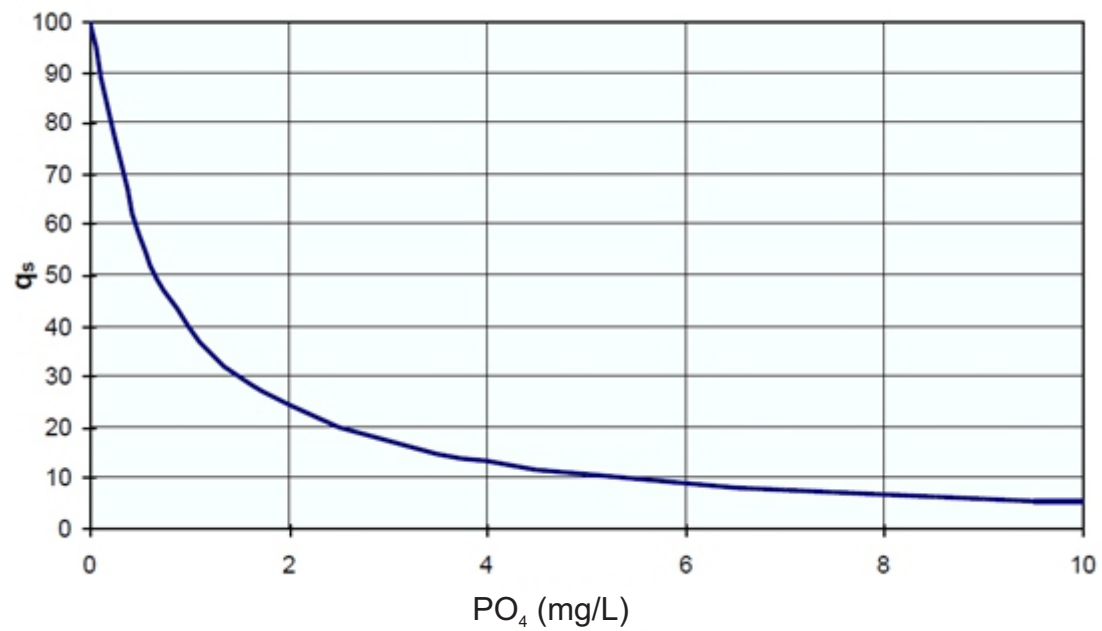

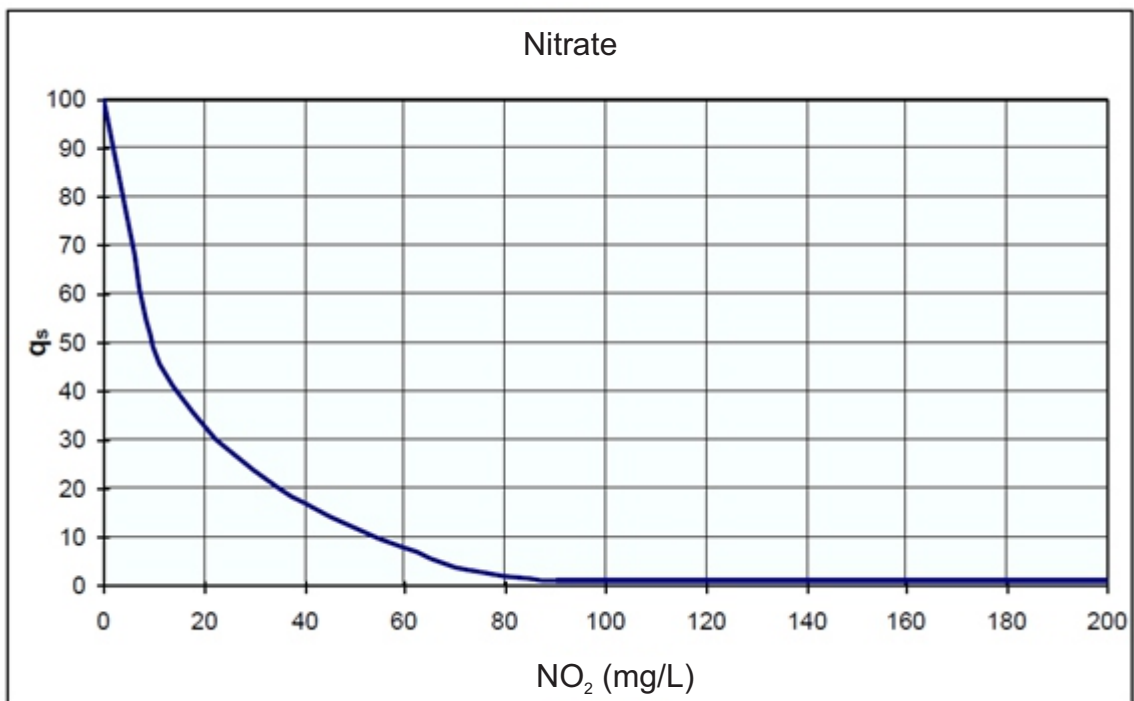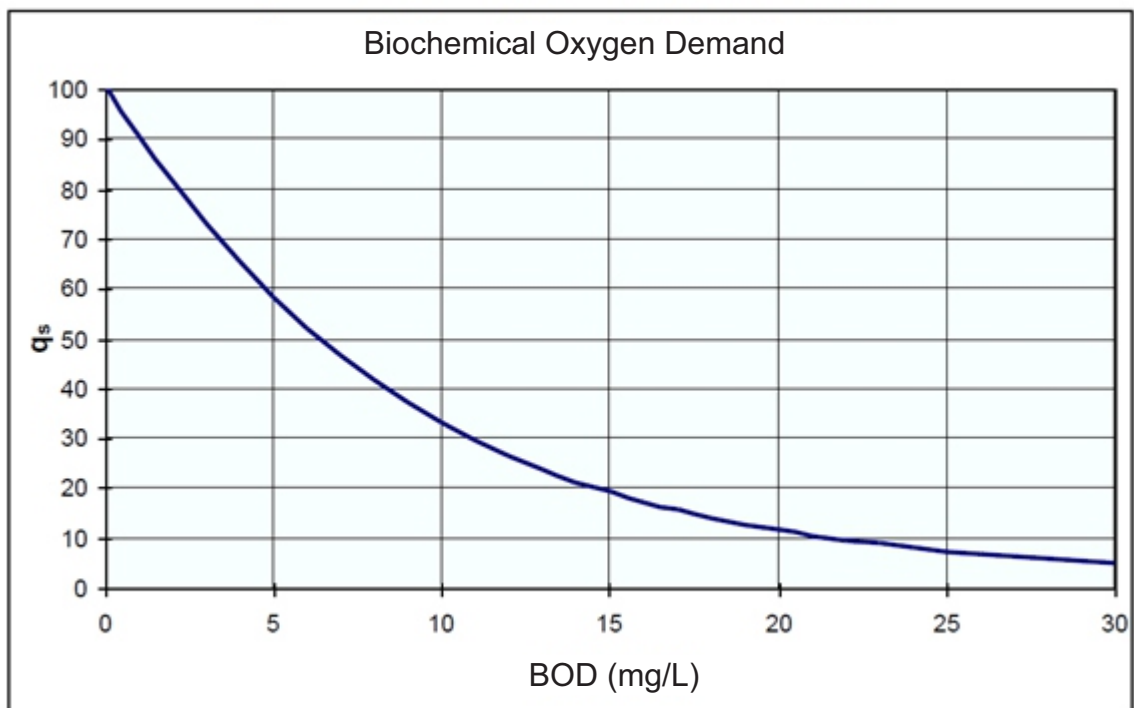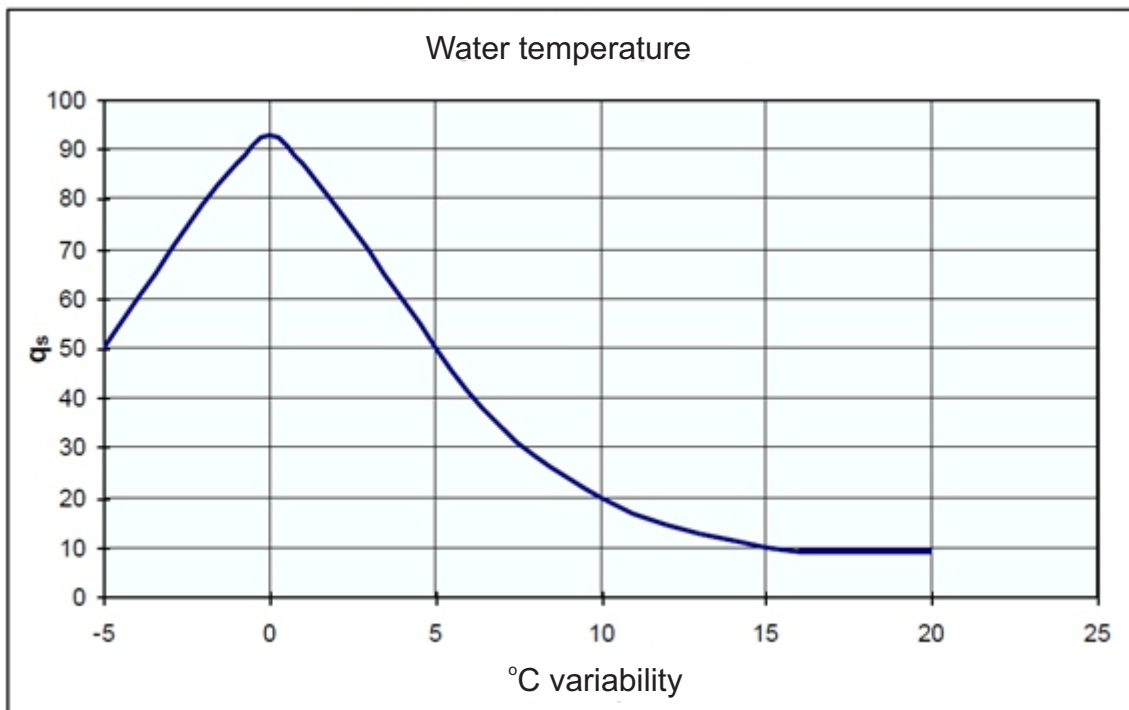

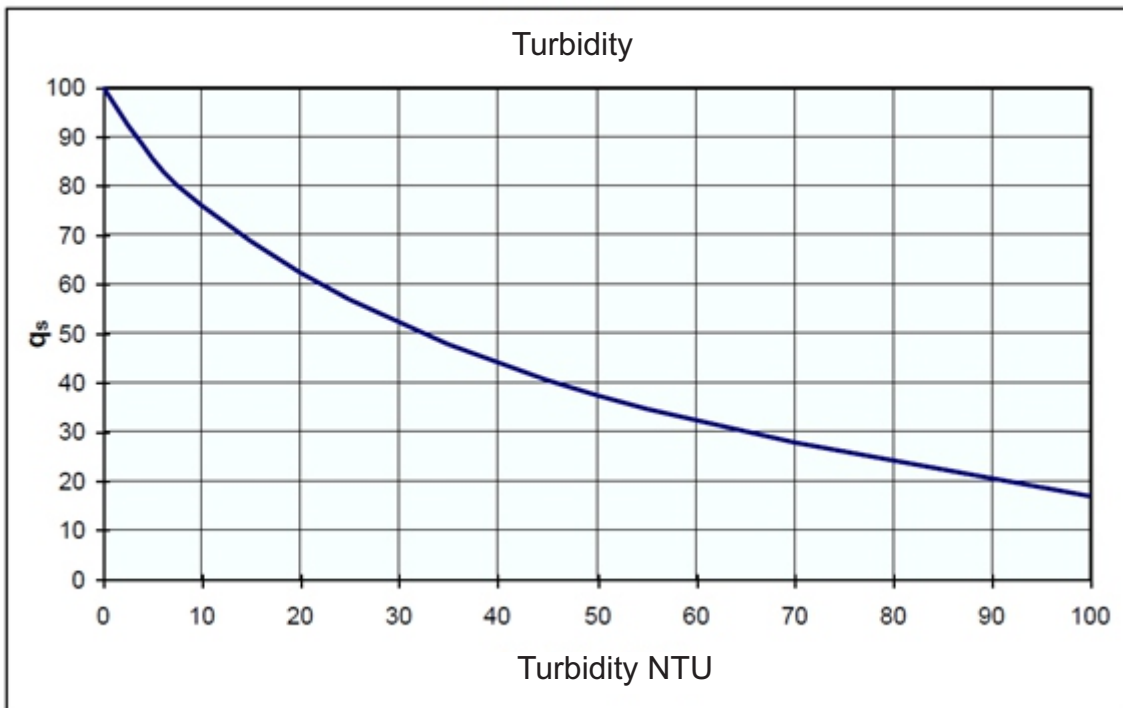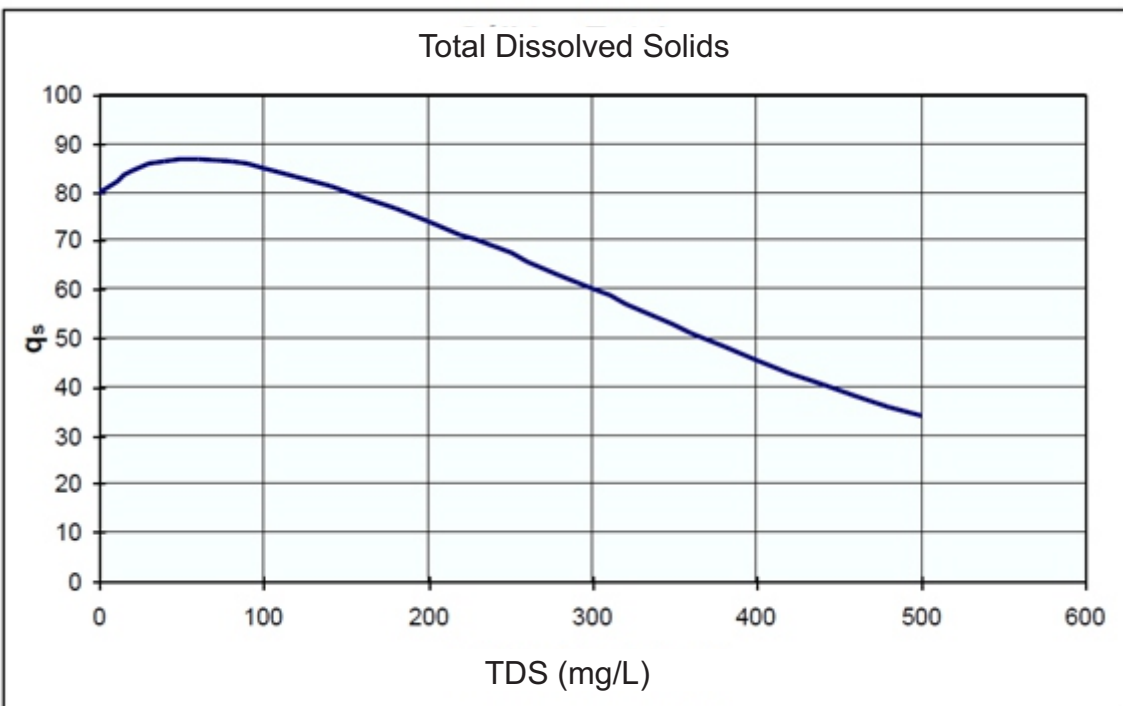

Supplement: Data_Sheet_1.PDF [file Data_Sheet_1.PDF]
