# Supplementary material for: Urban stream rehabilitation in a densely populated Brazilian metropolis
Source: Frontiers journal article supplement (doi:10.3389/fenvs.2022.921934), 2022-09-08
Supplement: Data_Sheet_2.XLSX [file Data_Sheet_2.XLSX]

## Sheet: Page1
Physical Habitat & Riparian Protocol (by Callisto et al., 2002)
Site:
Date: ­___ /___/___		Hour: __________
Weather:
Colector type:
Environment: Stream ( ) River ( )
Width:
Depth:
Water temperature:
Total Score: ________ (<40 Impacted; 41-60 Altered; >61 Reference condiction)
PARAMETERS	SCORE
	4 points	2 points	0 point
1. Riparian Land Use and Cover	Natural cover	Pasture, agriculture, reforestation	Urban, industrial, mining
2. Bank Erosion and Siltation	Absent	Moderate	Acentuada
3. Human Disturbance	Absent	Changes of domestic origin (sewage or garbage)	Changes of industrial/urban origin (factories, channelizing, mining, stream straightening)
4. Instream Vegetation Cover	Partial	Total	Absent
5. Water Odor	Absent	Sewage	Oil or industry
6. Water oiliness	Absent	Moderate	Abundante
7. Water Transparency	Transparent	Blurred or turbid	Opaque or colored
8. Bed Sediment Odor	Absent	Sewage	Oil or industry
9. Bed Sediment Ooiliness	Absent	Moderate	Abundante
10. Predominant Substract Type	Cobble or gravel	Mud or sand	Channeled

## Sheet: Page2
PARAMETER	SCORE
	5 points	3 points	2 points	0 points
11. In stream cover	Greater than 50% of substrate favorable for epifaunal colonization and fish cover; mix of snags, submerged logs, undercut banks, cobble or other stable habitat.	30-50% mix of stable habitat; well-suited for full colonization potential; adequate habitat for maintenance of populations.	10-30% mix of stable habitat; habitat availability less than desirable; substrate frequently disturbed or removed.	Less than 10% stable habitat; lack of habitat is obvious; substrate unstable or lacking.
12. Runs extentions	Well-developed riffle and run; riffle as wide as stream and length extends two times the width of stream; abundance of cobble. (Bolders prevalent in headwater streams).	Riffle is as wide as stream but lenth is less than two times width; abundance of cobble; boulders and gravel common.	Run area may be lacking; riffle not as wide as stream and its length is less than 2 times the stream width; gravel or bedrock prevalent; some cobble present.	Riffles or runs virtually nonexistent; bedrock prevalent; cobble lacking.
13. Frequency of Riffles	Occurrence of riffles relatively frequent; ratio of distance between riffles divided by width of the stream <7:1 (generally 5 to 7); variety of habitat is key. In streams where riffles are continuous, placement of boulders or other large, natural obstruction is important.	Occurrence of riffles infrequent; distance between riffles divided by the width of the stream is between 7 to 15.	Occasional riffle or bend; bottom contours provide some habitat; distance between riffles divided by the width of the stream is between 15 to 25.	Generally all flat water or shallow riffles; poor habitat; distance between riffles divided by the width of the stream is a ratio of >25
14. Pool Substrate Characterization	Mixture of substrate materials, with gravel and firm sand prevalent; root mats and submerged vegetation common.	Mixture of soft sand, mud, or clay; mud may be dominant; some root mats and submerged vegetation present.	All mud or clay or sand bottom; little or no root mat; no submerged vegetation	Hard-pan clay or bedrock; no root mat or submerged vegetation.
15. Embeddedness	Gravel, cobble, and boulder particles are 0-25% surrounded by fine sediment. Layering of cobble provides diversity of niche space.	Gravel, cobble, and boulder particles are 25-50% surrounded by fine sediment.	Gravel, cobble, and boulder particles are 50-75% surrounded by fine sediment.	Gravel, cobble, and boulder particles are more than 75% surrounded by fine sediment.
16. Sediment Deposition	Little or no enlargement of islands or point bars and less than 5% (<20% for low-gradient streams) of the bottom affected by sediment deposition.	Some new increase in bar formation, mostly from gravel, sand or fine sediment; 5-30% (20-50% for low-gradient) of the bottom affected; slight deposition in pools.	Moderate deposition of new gravel, sand or fine sediment on old and new bars; 30-50% (50-80% for low-gradient) of the bottom affected; sediment deposits at obstructions, constrictions, and bends; moderate deposition of pools prevalent.	Heavy deposits of fine material, increased bar development; more than 50% (80% for low-gradient) of the bottom changing frequently; pools almost absent due to substantial sediment deposition.
18. Channel Flow Status	Water reaches base of both lower banks, and minimal amount of channel substrate is exposed.	Water fills >75% of the available channel; or <25% of channel substrate is exposed.	Water fills 25-75% of the available channel, and/or riffle substrates are mostly exposed.	Very little water in channel and mostly present as standing pools.
19. Bank Vegetative Protection	More than 90% of the streambank surfaces and immediate riparian zones covered by native vegetation, including trees, understory shrubs, or nonwoody macrophytes; vegetative disruption through grazing or mowing minimal or not evident; almost all plants allowed to grow naturally.	70-90% of the streambank surfaces covered by native vegetation, but one class of plants is not well-represented; disruption evident but not affecting full plant growth potential to any great extent; more than one-half of the potential plant stubble height remaining.	50-70% of the streambank surfaces covered by vegetation; disruption obvious; patches of bare soil or closely cropped vegetation common; less than one-half of the potential plant stubble height remaining.	Less than 50% of the streambank surfaces covered by vegetation; disruption of streambank vegetation is very high; vegetation has been removed to 5 centimeters or less in average stubble height.
20. Bank Stability	Banks stable; evidence of erosion or bank failure absent or minimal; little potential for future problems. <5% of bank affected.	Moderately stable; infrequent, small areas of erosion mostly healed over. 5-30% of bank in reach has areas of erosion.	Moderately unstable; 30-60% of bank in reach has areas of erosion; high erosion potential during floods.	Unstable; many eroded areas; "raw" areas frequent along straight sections and bends; obvious bank sloughing; 60-100% of bank has erosional scars.
21. Riparian Vegetative Zone Width	Width of riparian zone >18 meters; human activities (i.e., parking lots, roadbeds, clear-cuts, lawns, or crops) have not impacted zone	Width of riparian zone 12-18 meters; human activities have impacted zone only minimally.	Width of riparian zone 6-12 meters; human activities have impacted zone a great deal.	Width of riparian zone <6 meters: little or no riparian vegetation due to human activities.
22. Aquatic plants presence	Small aquatic macrophytes and/or mosses distributed along the streambed.	Aquatic macrophytes or filamentous algae or mosses distributed in the stream, substrate with periphyton.	Filamentous algae or macrophytes on few rocks or some backwaters, abundant periphyton and biofilm.	Absence of aquatic vegetation in the river bed or presence of large macrophytic banks (eg water hyacinth).
