# Supplementary material for: Urban stream rehabilitation in a densely populated Brazilian metropolis
Source: Frontiers journal article supplement (doi:10.3389/fenvs.2022.921934), 2022-09-08
Supplement: Data_Sheet_3.XLSX [file Data_Sheet_3.XLSX]

## Sheet: Planilha2
Stream catchment:
Number:
Localization:
Interviewer:			___ /___/ 2008
Tab by:			___ /___/ 2008
Name of interviewee:
Sex of interviewee:	Male – [1 ] / Female – [ 2 ]
1. GENERAL INFORMATION
1.1 How many years has your family lived in this house?
1 year or less [ 1 ] – 1 to 3 years [ 2 ] – 3 to 10 years – [ 3 ] More than 10 years [ 4 ]
1.2 Education of interviewee
Neither	1	Middle School Comp.	5
Elementary school Inc.	2	High School Inc.	6
Elementary School Comp.	3	High School Comp.	7
Middle School Inc.	4	College Inc.	8
		College Comp.	9
1.3 Age of interviewee
17 to 20 years	1	41 to 50 years	4
21 to 30 years	2	51 to 60 years	5
31 to 40 years	3	More than 60 years	6
1.4 Housing condition
Own home [ 1 ] – house rented [ 2 ] – housed given [ 3 ] – Outher (_____________________) [ 4 ]
1.5 Family income
Up to 1 minimum wage [ 1 ] – 1 to 3 minimum wages [ 2 ] – 4 to 6 minimum wages [ 3 ] – 7 to 10 minimum wages [ 4 ] – More than 10 minimum wages [ 5 ]
1.6 Have you had property indemnified (in part or in whole) by municipal government because of stream intervention?
No [ 1 ] Yes, in part [ 2 ] Yes, in whole [ 3 ]
1.7 Has your property always been directed to where the Drenurbs Riparian Park is today?
Yes [ 1 ] – No (there was a house between mine and the stream) [ 2 ]
2. ABOUT THE DRENURBS STREAM REHABILITATION PROJECT
2.1 Do you know that the intervention done in the stream is part of the Drenurbs Program?
Yes [ 1 ] – No [ 2 ]
2.2 How do you rate your knowledge about the Drenurbs Program?
Not known	1	Know about this and other Drenurbs stream rehabilitation in the city	3
Know only about this stream rehabilitation	2	In addition to the stream rehabilitation invervention, he is well acquainted with the whole Program	4
2.3 How did you find out about stream rehabilitation' actions in your neighborhood?
Através de reportagens no rádio, jornal (de folha, da televisão), internet etc. [ 1 ] – Através das reuniões realizadas pelo Programa na região [ 2 ] – Através da divulgação da PBH (panfleto, cartaz, divulgação na rua etc.) [ 3 ] – Outro meio (__________________________________)[ 4 ]
2.4 When did you hear about stream rehabilitation' actions in your neighborhood?
Before the start of the intervention works [ 1 ] – During of the intervention works [ 2 ] – After of the intervention works [ 3 ]
2.5 Have you, or someone you know, had the opportunity to attend Drenurbs meetings in your neighborhood?
Yes [ 1 ] – No [ 2 ] (If no, go to 2.7)
2.6 Se sim, quando ocorreu a participação?
Before the start of the intervention works [ 1 ] – During of the intervention works [ 2 ] – After and during of the intervention works [ 3 ] - After of the intervention works [ 4 ] - Before the start of the intervention works as well as today [ 5 ]
2.7 In the relationship between Municipal Government and the community during the execution of stream rehabilitation you feel
Satisfied [ 1 ] – Dissatisfied [ 2 ] – More or less satisfied [ 3 ]
Why? ( _______________________________________________________________________ )
2.8 How do you rate the stream rehabilitation?
Modifies for the better the reality of the local community	1	Changes the reality of the local community for the worse	2
It does not change the reality of the local community in any way	3
2.9 What benefits have stream rehabilitation's actions brought to the community?
Creation of a protected area	1	Aesthetic improvements	5
Areas reserved for sports and leisure	2	Better road access	6
Real estate value increase	3	Cleaner stream	7
Decreased flooding risk	4	Other (________________________)	8
2.10 What problems did the actions of stream rehabilitation bring to the local community?
Impact of the work on the structure of the houses and other inconveniences	1	Neighbors, friends or relatives were removed from the neighborhood	4
Decreased local security	2	Increase in expenses with water and sewage tariffs	5
Storm drains & sanitary sewers not improved	3	Other (________________________)	6
2.11 If the Municipal Governenment had chosen to channel and buried the stream below the street in this place, instead of the rehabilitatrion what was done, do you think it would be:
Better [ 1 ] – Worst [ 2 ] – Not Known [ 3 ]
