# Supplementary material for: Urban stream rehabilitation in a densely populated Brazilian metropolis
Source: Frontiers journal article supplement (doi:10.3389/fenvs.2022.921934), 2022-09-08
Supplement: Data_Sheet_4.XLSX [file Data_Sheet_4.XLSX]

## Sheet: Plan1
	RECURB: Questionnaire of social perception about the parks of the DRENURBS program [nº __ __ __ ]
	1 DADOS GERAIS
	1.1 Interviewer:		[ ] -1	[ ] -2	[ ] -3	[ ] -4	[ ] -5	[ ] -6
	1.2 Stream:		[ ] -1 1º de Maio		[ ] -2 NS Piedade			[ ] -3 Baleares
	1.3 Date:	___/___/____
	2 RESPONDENT'S SOCIODEMOGRAPHIC DATA
	2.1 Sex _____________
	2.2 How many years has your family lived in this house? _____ years.
	2.3 How many people live in this house? _____ people.
	2.4 How old are you? _____ years old.
	2.5 What is your schooling?
	[ ] 1 - Neither		[ ] 2 - Can read and write		[ ] 3 - Older Adult Schooling		[ ] 4 - Elementary school Inc.
	[ ] 5 - Elementary School Comp.		[ ] 6 - Middle School Inc.		[ ] 7 - Middle School Comp.		[ ] 8 - High School Inc.
	[ ] 9 - High School Comp.		[ ] 10 - College Inc.		[ ] 11 - College Comp.
	3 STREAM REHABILITATION
	3.1 How do you evaluate the space modifications carried out in the stream?
	[ ] 1 - Great		[ ] 2 - Good		[ ] 3 - Fair		[ ] 4 - Bad
	[ ] 5 - Terrible		[ ] 6 - Not known		[ ] 7 - Wasn't a resident before the rehabilitation interventions (Go to 3.3)
	3.2 Were the problems related to flooding, garbage, bad smell and space degradation solved after the stream rehabilitation? (After answer, go to 3.4)
	[ ] 1 - Totally solved			[ ] 2 - Partially solved
	[ ] 3 - Not solved			[ ] 4 - Not known
	3.3 Were the rehabilitated stream and the creation of the riparian park an attraction for the choice of housing?
	[ ] 1 - No	[ ] 2 - Não
	3.4 Do you like to live near the park and the stream?
	[ ] 1 - Yes	[ ] 2- No
	3.5 Compared to a stream buried under a street, do you think transforming it into a riparian park is a better alternative?
	[ ] 1 - Yes	[ ] 2- No
	3.6 Do you recommend that interventions such as those carried out in this area be carried out in other parts of the city?
	[ ] 1 - Yes	[ ] 2 - No
	3.6.1 Positive aspects of local stream rehabilitation interventions
	[ ] 1 - Cleaner stream		[ ] 2 - Aesthetic improvements			[ ] 3 - Areas reserved for the local community
	[ ] 4 - Better road access		[ ] 5 - Real estate value increase			[ ] 6 - Areas reserved for sports and leisure
	[ ] 7 - Better local security		[ ] 8 - Decreased flooding risk			[ ] 9 - Creation of a protected area
	[ ] 10 - Slum removal		[ ] 11 - Others ______________
	3.6.2 Negative aspects of local stream rehabilitation interventions
	[ ] 1 - Storm drains & sanitary sewers not improved			[ ] 2 - Impact of the work on the structure of the houses and other inconveniences			[ ] 3 - Neighbors, friends or relatives were removed from the neighborhood
	[ ] 4 - More people circulating			[ ] 5 - Higher density of disease vectors			[ ] 1 -Decreased local security
	[ ] 7 - Road systems worsened			[ ] 8 - Others _____________
